# Supplementary material
Source: MDPI journal article supplement (https://www.mdpi.com/2310-2861/7/4/164)
Supplement: s1 [file s1]

Archive with 1 entries (1 files):
- gels-1387323-supplementary.pdf
